# Supplementary material for: Calcium Silicate-Based Sealer Dentinal Tubule Penetration—A Systematic Review of In Vitro Studies
Source: MDPI journal article supplement (doi:10.3390/ma16072734), 2023-03-29
Supplement: s1 [file s1]

**Supplementary table 1.** mean  $\pm$  (standard deviation or standard error\*) results of tubular penetration depth & percentage.

| Author/ date                       | Sealer, filling method               | Tubular penetration distance/ Depth (um) |                        |                   |                 | Percentage of sealer penetration % |                  |         |       |
|------------------------------------|--------------------------------------|------------------------------------------|------------------------|-------------------|-----------------|------------------------------------|------------------|---------|-------|
|                                    |                                      | apical                                   | middle                 | coronal           | total           | apical                             | middle           | coronal | total |
| (Maharani et al., 2021) [37]       | iRoot SP without SUA, SC             |                                          |                        |                   | 638.13 (166.45) |                                    |                  |         |       |
|                                    | iRoot SP with SUA, SC                |                                          |                        |                   | 651.50 (236.63) |                                    |                  |         |       |
|                                    | Endoseal MTA Without SUA, SC         |                                          |                        |                   | 580.13 (121.25) |                                    |                  |         |       |
|                                    | Endoseal MTA with SUA, SC            |                                          |                        |                   | 914.25 (231.84) |                                    |                  |         |       |
| (Alim Uysal et al., 2021) [38]     | AH plus, SC                          | 444,40 (142,09)                          | 705,65 (107,96)        | 977,35 (228,67)   |                 |                                    |                  |         |       |
|                                    | MTA Fillapex, SC                     | 457,60 (141,04)                          | 726,50 (111,66)        | 1,007,55 (196,64) |                 |                                    |                  |         |       |
|                                    | Endosequence BC sealer, SC           | 469,80 (93,39)                           | 848,50 (140,95)        | 1,092,05 (198,23) |                 |                                    |                  |         |       |
| Eid et al., 2021) [39]             | Bio-C sealer, SC                     | 397.428 $\pm$ 77.46                      | 1080.92 $\pm$ 575.228  |                   |                 |                                    |                  |         |       |
|                                    | Bio-C sealer, WVC                    | 447.076 $\pm$ 303.082                    | 1421.98 $\pm$ 509.75   |                   |                 |                                    |                  |         |       |
|                                    | HiFlow, SC                           | 194.24 $\pm$ 227.369                     | 1115.051 $\pm$ 619.506 |                   |                 |                                    |                  |         |       |
|                                    | HiFlow, WVC                          | 672.82 $\pm$ 390.807                     | 1567.634 $\pm$ 666.873 |                   |                 |                                    |                  |         |       |
| (Marissa et al., 2020) [42]        | IRoot® SP, SC                        |                                          | 115.99 (13.1)          |                   |                 |                                    |                  |         |       |
|                                    | MTA® Fillapex, SC                    |                                          | 209.28 (34.31)         |                   |                 |                                    |                  |         |       |
|                                    | BioRoot™ RCS, SC                     |                                          | 84.07 (5.6)            |                   |                 |                                    |                  |         |       |
| (el Hachem et al., 2019) [43]      | AH Plus                              | 568.96 $\pm$ 222.89                      | 984.29 $\pm$ 271.55    |                   |                 |                                    |                  |         |       |
|                                    | EndoSequence BC                      | 600.84 $\pm$ 235.93                      | 1152.81 $\pm$ 257.51   |                   |                 |                                    |                  |         |       |
|                                    | NTS                                  | 656.89 $\pm$ 272.93                      | 1063.61 $\pm$ 293.52   |                   |                 |                                    |                  |         |       |
| (Aktemur Türker et al., 2018) [45] | AH 26, SC,<br>With smear layer       |                                          | 1413 $\pm$ 330 *       |                   |                 |                                    | 73.00 $\pm$ 20.2 |         |       |
|                                    | BioRoot RCS, SC,<br>With smear layer |                                          | 1248 $\pm$ 390 *       |                   |                 |                                    | 75.83 $\pm$ 27.1 |         |       |
|                                    | MTA Plus, SC,<br>With smear layer    |                                          | 1972 $\pm$ 330 *       |                   |                 |                                    | 75.67 $\pm$ 19.5 |         |       |
|                                    | AH 26, SC,<br>No smear layer         |                                          | 1443 $\pm$ 100 *       |                   |                 |                                    | 78.50 $\pm$ 17.4 |         |       |
|                                    | BioRoot RCS, SC,                     |                                          | 999 $\pm$ 360 *        |                   |                 |                                    | 68.33 $\pm$ 28.0 |         |       |

|                              |                                 |  |              |  |                 |  |              |  |  |
|------------------------------|---------------------------------|--|--------------|--|-----------------|--|--------------|--|--|
|                              | No smear layer                  |  |              |  |                 |  |              |  |  |
|                              | MTA Plus, SC,<br>No smear layer |  | 1701 ± 390 * |  |                 |  | 88.08 ± 12.5 |  |  |
| (Arikatla et al., 2018) [46] | AH plus, LC                     |  |              |  | 309.55 (113.82) |  |              |  |  |
|                              | MTA plus, LC                    |  |              |  | 192.54 (55.16)  |  |              |  |  |
|                              | BioRoot RCS, LC                 |  |              |  | 221.00 (59.37)  |  |              |  |  |

**SUA:** Sealer Ultrasonic activation, **SC:** Single cone, **WVC:** Warm vertical compaction, **LC:** Lateral condensing, \*: distance in millimetres (mm).

**Supplementary table 2.** Median (M), Min, Max and Interquartile range (IQR) results of tubular penetration depth and percentage.

| Author/<br>Date              | Sealer                      | Tubular penetration distance / depth (um) |         |         |        |        |         |         |        |         |         |         |        | percentage of sealer penetration % |         |         |       |        |         |         |       |         |         |         |       |
|------------------------------|-----------------------------|-------------------------------------------|---------|---------|--------|--------|---------|---------|--------|---------|---------|---------|--------|------------------------------------|---------|---------|-------|--------|---------|---------|-------|---------|---------|---------|-------|
|                              |                             | Apical                                    |         |         |        | Middle |         |         |        | Coronal |         |         |        | Apical                             |         |         |       | Middle |         |         |       | Coronal |         |         |       |
|                              |                             | M                                         | mi<br>n | ma<br>x | IQR    | M      | mi<br>n | ma<br>x | IQR    | M       | mi<br>n | ma<br>x | IQR    | M                                  | mi<br>n | ma<br>x | IQR   | M      | mi<br>n | ma<br>x | IQR   | M       | mi<br>n | ma<br>x | IQR   |
| (Muedra et al., 2021) [40]   | EndoSequence BC Sealer, SC  | 475.35                                    |         |         | 404.81 | 981.33 |         |         | 581.14 | 1316.57 |         |         | 804.57 | 33.65                              |         |         | 52.15 | 49.73  |         |         | 44.23 | 55.64   |         |         | 43.23 |
|                              | BioRoot RCS, SC             | 304.32                                    |         |         | 505.02 | 508.11 |         |         | 715.84 | 743.74  |         |         | 781.18 | 9.76                               |         |         | 29.75 | 24.08  |         |         | 41.71 | 28.41   |         |         | 34.98 |
|                              | (Control), AH Plus, SC      | 193.25                                    |         |         | 431.55 | 449.03 |         |         | 612.64 | 1118.01 |         |         | 727.53 | 11.8                               |         |         | 13.25 | 39.67  |         |         | 28.83 | 60.37   |         |         | 27.14 |
| (Reynolds et al., 2020) [41] | 2Seal easymiX, WVC          | 0.9 *                                     | 0.2 *   | 1.8 *   |        |        |         |         |        | 1.6 *   | 0.8 *   | 2.6 *   |        | 79.5                               | 49      | 100     |       |        |         |         |       | 100     | 49      | 100     |       |
|                              | EndoSequence BC, SC         | 0.9 *                                     | 0.1 *   | 1.8 *   |        |        |         |         |        | 2.1 *   | 0.3 *   | 2.3 *   |        | 79.5                               | 4       | 100     |       |        |         |         |       | 100     | 45      | 100     |       |
|                              | EndoSequence BC, WVC        | 0.9 *                                     | 0.4 *   | 1.8 *   |        |        |         |         |        | 1.9 *   | 0.8 *   | 2.3 *   |        | 93.5                               | 61      | 100     |       |        |         |         |       | 100     | 91      | 100     |       |
|                              | EndoSequence BC hiflow, SC  | 1 *                                       | 0.5 *   | 1.9 *   |        |        |         |         |        | 2.1 *   | 1.3 *   | 2.3 *   |        | 80                                 | 49      | 100     |       |        |         |         |       | 100     | 69      | 100     |       |
|                              | EndoSequence BC hiflow, WVC | 1.1 *                                     | 0.6 *   | 1.8 *   |        |        |         |         |        | 1.8 *   | 1.1 *   | 2.5 *   |        | 77.5                               | 53      | 100     |       |        |         |         |       | 100     | 80      | 100     |       |

SC: Single cone, WVC: Warm vertical compaction, \*: distance in millimetres (mm).

**Supplementary table 3.** Quality assessment of the included studies.

|                                              | 1 |   | 2 |   | 3 |   |   | 4 |   |   | 5 |   |   |   | 6 |   |   |   | 7 |   |   |   | 8 |   | 9 |   | 10 |   | 11 |   |   |   |   |   |   |   |   |   |   |    |    |
|----------------------------------------------|---|---|---|---|---|---|---|---|---|---|---|---|---|---|---|---|---|---|---|---|---|---|---|---|---|---|----|---|----|---|---|---|---|---|---|---|---|---|---|----|----|
|                                              | a | b | a | a | b | c | d | e | a | b | a | b | c | d | e | f | g | h | i | j | a | b | c | a | b | c | d  | e | a  | b | a | a | a | b | c | d | e | f | g | h  | %  |
| (Maharan i, Ricardo, Ayu, et al., 2021) [37] | N | Y | Y | N | Y | N | Y | Y | Y | Y | Y | N | Y | Y | Y | N | N | N | N | N | Y | N | Y | Y | Y | Y | N  | N | Y  | Y | Y | Y | Y | Y | Y | Y | Y | Y | Y | Y  | 78 |
| (Alim Uysal et al., 2021) [38]               | N | Y | Y | N | Y | Y | Y | Y | Y | Y | Y | N | N | Y | Y | N | N | N | N | Y | N | N | Y | Y | Y | Y | Y  | Y | Y  | Y | Y | Y | Y | Y | Y | Y | Y | Y | Y | Y  | 83 |
| (Eid et al., 2021) [39]                      | Y | Y | Y | N | Y | Y | Y | Y | Y | Y | Y | N | Y | Y | Y | N | N | N | N | Y | Y | N | Y | Y | Y | N | N  | Y | Y  | Y | N | Y | Y | Y | Y | Y | Y | Y | Y | Y  | 83 |
| (Muedra et al., 2021) [40]                   | Y | Y | Y | Y | Y | Y | Y | Y | Y | Y | Y | Y | Y | Y | Y | N | N | N | N | Y | Y | N | Y | Y | Y | Y | Y  | Y | Y  | Y | Y | Y | Y | Y | N | Y | Y | Y | Y | Y  | 94 |
| (Reynolds et al., 2020) [41]                 | Y | Y | Y | N | Y | N | Y | Y | Y | Y | Y | N | Y | Y | Y | N | N | N | N | N | N | Y | N | Y | Y | N | Y  | Y | Y  | Y | Y | Y | Y | Y | Y | Y | Y | Y | Y | Y  | 81 |
| (Marissa et al., 2020) [42]                  | N | Y | Y | Y | Y | N | Y | Y | Y | Y | N | N | N | Y | Y | N | N | N | N | Y | Y | N | Y | Y | Y | N | N  | N | Y  | Y | Y | N | Y | Y | Y | N | Y | Y | Y | Y  | 69 |
| (el Hachem et al., 2019) [43]                | Y | Y | Y | N | Y | N | Y | Y | Y | Y | Y | N | N | Y | Y | N | N | N | N | Y | Y | N | Y | Y | Y | N | Y  | Y | Y  | Y | Y | Y | Y | Y | Y | Y | Y | Y | N | Y  | 81 |
| (Kim et al., 2019) [44]                      | Y | Y | Y | N | Y | Y | Y | Y | Y | Y | Y | Y | N | Y | Y | N | N | N | N | N | N | N | Y | Y | Y | Y | N  | N | N  | Y | Y | Y | Y | Y | Y | Y | Y | Y | Y | 81 |    |
| (Aktemur Türker et al., 2018) [45]           | N | Y | Y | N | Y | N | N | Y | Y | Y | N | N | N | Y | Y | N | N | N | N | N | Y | N | Y | Y | Y | N | N  | N | Y  | Y | Y | Y | Y | Y | N | N | Y | Y | Y | Y  | 61 |

|                               |   |   |   |   |   |   |   |   |   |   |   |   |   |   |   |   |   |   |   |   |   |   |   |   |   |   |   |   |   |   |   |   |   |   |   |   |   |   |   |   |   |   |
|-------------------------------|---|---|---|---|---|---|---|---|---|---|---|---|---|---|---|---|---|---|---|---|---|---|---|---|---|---|---|---|---|---|---|---|---|---|---|---|---|---|---|---|---|---|
| (Arikatla et al., 2018) [46]  | N | Y | Y | Y | Y | Y | Y | Y | Y | Y | N | N | N | Y | Y | N | N | N | N | Y | Y | N | Y | Y | Y | N | N | Y | Y | Y | Y | Y | Y | Y | N | Y | Y | Y | N | Y | 7 |   |
|                               |   |   |   |   |   |   |   |   |   |   |   |   |   |   |   |   |   |   |   |   |   |   |   |   |   |   |   |   |   |   |   |   |   |   |   |   |   |   |   |   |   | 5 |
| (McMichael et al., 2016) [47] | N | Y | Y | Y | Y | N | Y | Y | Y | Y | Y | N | N | Y | Y | N | N | N | N | N | N | N | Y | Y | Y | N | N | N | Y | Y | Y | Y | Y | Y | Y | Y | Y | Y | N | Y | 6 |   |
|                               |   |   |   |   |   |   |   |   |   |   |   |   |   |   |   |   |   |   |   |   |   |   |   |   |   |   |   |   |   |   |   |   |   |   |   |   |   |   |   |   |   | 9 |
| (Akçay et al., 2016) [48]     | Y | Y | Y | Y | Y | Y | Y | Y | Y | Y | N | N | N | Y | Y | N | N | N | N | Y | Y | N | Y | Y | Y | N | Y | Y | Y | Y | Y | Y | Y | Y | Y | N | N | Y | Y | N | Y | 7 |
|                               |   |   |   |   |   |   |   |   |   |   |   |   |   |   |   |   |   |   |   |   |   |   |   |   |   |   |   |   |   |   |   |   |   |   |   |   |   |   |   |   |   | 8 |
|                               |   |   |   |   |   |   |   |   |   |   |   |   |   |   |   |   |   |   |   |   |   |   |   |   |   |   |   |   |   |   |   |   |   |   |   |   |   |   |   |   |   | 7 |
|                               |   |   |   |   |   |   |   |   |   |   |   |   |   |   |   |   |   |   |   |   |   |   |   |   |   |   |   |   |   |   |   |   |   |   |   |   |   |   |   |   |   | 8 |

Quality assessment of included studies using the PRILE 2021 guidelines for reporting laboratory studies in Endodontology [34].

Y: item reported in the study, N: item not reported in the study, NA: Non-applicable.
